# Supplementary material
Source: HighWire-hosted journal article supplement (https://cmaj.ca/highwire/filestream/57806/field_highwire_adjunct_files/0/apro-henry-1-at.pdf)
Supplement: apro-henry-1-at.pdf [file apro-henry-1-at.pdf]

## Appendix 1: Studies included in Figures 2–8

- Alderman EL, Levy JH, Rich JB, Nili M, Vidne B, Schaff H, et al. Analyses of coronary graft patency after aprotinin use: results from the International Multicenter Aprotinin Graft Patency Experience (IMAGE) trial. *Journal of Thoracic & Cardiovascular Surgery* 1998;116(5):716-30.
- Alvarez JM, Quiney NF, McMillan D, Joscelyne K, Connelly T, Brady P, et al. The use of ultra-low-dose aprotinin to reduce blood loss in cardiac surgery. *Journal of Cardiothoracic & Vascular Anesthesia* 1995;9(1):29-33.
- Alvarez JM, Jackson LR, Chatwin C, Smolich JJ. Low-dose postoperative aprotinin reduces mediastinal drainage and blood product use in patients undergoing primary coronary artery bypass grafting who are taking aspirin: a prospective, randomized, double-blind, placebo-controlled trial. *Journal of Thoracic & Cardiovascular Surgery* 2001;122(3):457-63.
- Andreasen JJ, Nielsen C. Prophylactic tranexamic acid in elective, primary coronary artery bypass surgery using cardiopulmonary bypass. *European Journal of Cardio-Thoracic Surgery* 2004;26(2):311-7.
- Armellini G, Casella S, Guzzinati S, Pasini L, Marcassa A, Giron G. Tranexamic acid in aortic valve replacement. *Journal of Cardiothoracic & Vascular Anesthesia* 2001;15(3):331-5.
- Ashraf S, Tian Y, Cowan D, Nair U, Chatrath R, Saunders NR, et al. "Low-dose" aprotinin modifies hemostasis but not proinflammatory cytokine release. *Annals of Thoracic Surgery* 1997;63(1):68-73.
- Asimakopoulos G, Kohn A, Stefanou DC, et al. Leukocyte integrin expression in patients undergoing cardiopulmonary bypass. *Ann Thorac Surg* 2000;69:1192-7.
- Baele PL, Ruiz-Gomez J, Londot C, Sauvage M, Van Dyck MJ, Robert A. Systematic use of aprotinin in cardiac surgery: influence on total homologous exposure and hospital cost. *Acta Anaesthesiologica Belgica* 1992;43(2):103-12.
- Bernet F, Carrel T, Marbet G, Skarvan K, Stulz P. Reduction of blood loss and transfusion requirements after coronary artery bypass grafting: similar efficacy of tranexamic acid and aprotinin in aspirin-treated patients. *Journal of Cardiac Surgery* 1999;14(2):92-7.
- Bidstrup BP, Royston D, Sapsford RN, Taylor KM. Reduction in blood loss and blood use after cardiopulmonary bypass with high dose aprotinin (Trasyol). *Journal of Thoracic & Cardiovascular Surgery* 1989;97(3):364-72.
- Bidstrup BP, Underwood SR, Sapsford RN, Streets EM. Effect of aprotinin (Trasyol) on aorta-coronary bypass graft patency. *Journal of Thoracic & Cardiovascular Surgery* 1993;105(1):147-52.
- Bidstrup BP, Hunt BJ, Sheikh S, Parratt RN, Bidstrup JM, Sapsford RN. Amelioration of the bleeding tendency of preoperative aspirin after aortocoronary bypass grafting. *Annals of Thoracic Surgery* 2000;69(2):541-7.
- Blauhut B, Harringer W, Bettelheim P, Doran JE, Spath P, Lundsgaard-Hansen P. Comparison of the effects of aprotinin and tranexamic acid on blood loss and related variables after cardiopulmonary bypass. *Journal of Thoracic & Cardiovascular Surgery* 1994;108(6):1083-91.
- Brown RS, Thwaites BK, Mongan PD. Tranexamic acid is effective in decreasing postoperative bleeding and transfusions in primary coronary artery bypass operations: A double-blind, randomized, placebo-controlled trial. *Anesthesia & Analgesia* 1997;85(5):963-970.
- Carrera A, Martinez MV, Garcia Guiral M, Herrero E, Peral A, Planas A. Utilizacion de altas dosis de aprotinina en cirugia cardiaca - High doses of aprotinin in cardiac surgery. *Revista Espanola de Anestesiologia y Reanimacion* 1994;41:13-9.
- Casas JJ, Zuazu-Jausoro I, Mateo J, Oliver A, Litvan H, Muniz-Diaz E, et al. Aprotinin versus desmopressin for patients undergoing operations with cardiopulmonary bypass. A double-blind placebo-controlled study. *Journal of Thoracic & Cardiovascular Surgery* 1995;110(4 Pt 1):1107-17.
- Casati V, Guzzon D, Oppizzi M, Cossolini M, Torri G, Calori G, Alfieri O. Hemostatic effects of aprotinin, tranexamic acid and epsilon-aminocaproic acid in primary cardiac surgery. *Annals of Thoracic Surgery* 1999;68(6):2252-6.
- Casati V, Guzzon D, Oppizzi M, Bellotti F, Franco A, Gerli C, et al. Tranexamic acid compared with high-dose aprotinin in primary elective heart operations: effects on perioperative bleeding and allogeneic transfusions. *Journal of Thoracic & Cardiovascular Surgery* 2000;120(3):520-7.
- Cicek S, Demirkilic U, Kuralay E, Ozal E, Tatar H. Postoperative Aprotinin: Effect on blood loss and transfusion requirements in cardiac operations. *Annals of Thoracic Surgery* 1996a;61:1372-6.
- Cicek S, Demirkilic U, Ozal E, Kuralay E, Bingol H, Tatar H, Ozturk OY. Postoperative use of aprotinin in cardiac operations: An alternative to its prophylactic use. *Journal of Thoracic & Cardiovascular Surgery* 1996b;112(6):1462-7.
- Cicekcioglu F, Cagli K, Emir M, et al. Effects of minimal dose aprotinin on blood loss and fibrinolytic system-complement activation in coronary artery bypass grafting surgery. *J Card Surg* 2006;21:336-41.
- Coffey A, Pittman J, Halbrook H, Fehrenbacher J, Beckman D, Hormuth D, et al. The use of tranexamic acid to reduce postoperative bleeding following cardiac surgery: A double-blind randomized trial. *American Surgeon* 1995;61(7):566-8.
- Cohen G, Ivanov J, Weisel RD, Rao V, Mohabeer MK, Mickel DA. Aprotinin and dipyridamole for the safe reduction of postoperative blood loss. *Annals of Thoracic Surgery* 1998;65(3):674-83.
- Cosgrove DM, 3d, Heric B, Lytle BW, Taylor PC, Novoa R, Golding LA, et al. Aprotinin therapy for reoperative myocardial revascularization: a placebo-controlled study. *Annals of Thoracic Surgery* 1992;54(6):1031-6.
- D'Ambra MN, Akins CW, Blackstone EH, Bonney SL, Cohn LH, Cosgrove DM, et al. Aprotinin in primary valve replacement and reconstruction: a multicenter, double-blind, placebo-controlled trial. *Journal of Thoracic & Cardiovascular Surgery* 1996;112(4):1081-9.
- Daily PO, Lamphere JA, Dembitsky WP, Adamson RM, Dans NF. Effect of prophylactic epsilon-aminocaproic acid on blood loss and transfusion requirements in patients undergoing first-time coronary artery bypass grafting. A randomized, prospective, double-blind study. *Journal of Thoracic & Cardiovascular Surgery* 1994;108(1):99-106.
- DelRossi AJ, Cernaianu AC, Botros S, Lemole GM, Moore R. Prophylactic treatment of postperfusion bleeding using EACA. *Chest* 1989;96(1):27-30.
- Dietrich W, Barankay A, Hahnel C, Richter JA. High-dose aprotinin in cardiac surgery: three years' experience in 1,784 patients. *Journal of Cardiothoracic & Vascular Anesthesia* 1992;6(3):324-7.
- Dietrich W, Diltz G, Spannagl M, Jochum M, Braun SL, Richter JA. Influence of high-dose aprotinin on anticoagulation, heparin requirement, and celite- and kaolin-activated clotting time in heparin-pretreated patients undergoing open-heart surgery. A double-blind, placebo-controlled study. *Anesthesiology* 1995;83(4):679-89.
- Dignan RJ, Law DW, Seah PW, Manganas CW, Newman DC, Grant PW, et al. Ultra-low dose aprotinin decreases transfusion requirements and is cost effective in coronary operations. *Annals of Thoracic Surgery* 2001;71(1):158-63.
- Diprose P, Herbertson MJ, O'Shaughnessy D, Deakin CD, Gill RS. Reducing allogeneic transfusion in cardiac surgery: a randomized double-blind placebo-controlled trial of antifibrinolytic therapies used in addition to intra-operative cell salvage. *British Journal of Anaesthesia* 2005;94(3):271-8.
- Dryden PJ, O'Connor JP, Jamieson WR, Reid I, Ansley D, Sadeghi H, et al. Tranexamic acid reduces blood loss and transfusion in reoperative cardiac surgery. *Canadian Journal of Anaesthesia* 1997;44(9):934-41.

- Englberger L, Markart P, Eckstein FS, Immer FF, Berdat PA, Carrel TP. Aprotinin reduces blood loss in off-pump coronary artery bypass (OPCAB) surgery. *European Journal of Cardio-Thoracic Surgery* 2002a;22(4):545-51.
- Englberger L, Kipfer B, Berdat PA, Nydegger UE, Carrel TP. Aprotinin in coronary operation with cardiopulmonary bypass: does "low-dose" aprotinin inhibit the inflammatory response? *Annals of Thoracic Surgery* 2002b;73(6):1897-904.
- Feindt P, Seyfert U, Volkmer I, et al. Is there a phase of hypercoagulability when aprotinin is used in cardiac surgery? *Eur J Cardiothorac Surg* 1994;8:308-13.
- Fergusson DA, Hébert PC, Mazer CD, et al. A comparison of aprotinin and lysine analogues in high-risk cardiac surgery. *N Engl J Med* 2008;358:2319-31.
- Golanski R, Golanski J, Chizynski K, Iwazskiewicz A, Zaslonka J, Pietrucha T, et al. Low doses of aprotinin in aortocoronary bypass surgery - advantages and disadvantages. *Medical Science Monitor* 2000;6(4):722-8.
- Gott JP, Cooper WA, Schmidt FE, et al. Modifying risk for extracorporeal circulation: trial of four anti-inflammatory strategies. *Ann Thorac Surg* 1998;66:747-53.
- Green D, Sanders J, Eiken M, Wong CA, Frederiksen J, Joob A, et al. Recombinant aprotinin in coronary artery bypass graft operations. *Journal of Thoracic & Cardiovascular Surgery* 1995;110(4 Pt 1):963-70.
- Harder MP, Eijssman L, Roozendaal KJ, van Oeveren W, Wildevuur CR. Aprotinin reduces intraoperative and postoperative blood loss in membrane oxygenator cardiopulmonary bypass. *Annals of Thoracic Surgery* 1991;51(6):936-41.
- Hardy JF, Desroches J, Belisle S, Perrault J, Carrier M, Robitaille D. Low-dose aprotinin infusion is not clinically useful to reduce bleeding and transfusion of homologous blood products in high-risk cardiac surgical patients. *Canadian Journal of Anaesthesia* 1993;40(7):625-31.
- Hardy JF, Belisle S, Dupont C, Harel F, Robitaille D, Roy M, et al. Prophylactic tranexamic acid and epsilon-aminocaproic acid for primary myocardial revascularization. *Annals of Thoracic Surgery* 1998;65(2):371-6.
- Hayashida N, Isomura T, Sato T, Maruyama H, Kosuga K, Aoyagi S. Effects of minimal-dose aprotinin on coronary artery bypass grafting. *Journal of Thoracic & Cardiovascular Surgery* 1997;114(2):261-9.
- Hekmat K, Zimmermann T, Kampe S, Kasper SM, Weber HJ, Geissler HJ, et al. Impact of tranexamic acid vs. aprotinin on blood loss and transfusion requirements after cardiopulmonary bypass: a prospective, randomised, double-blind trial. *Current Medical Research & Opinion* 2004;20(1):121-6.
- Horrow JC, Van Riper DF, Strong MD, Brodsky I, Parmet JL. Hemostatic effects of tranexamic acid and desmopressin during cardiac surgery. *Circulation* 1991;84(5):2063-70.
- Jamieson WRE, Dryden PJ, O'Connor JP, Sadeghi H, Ansley DM, Merrick PM, et al. Beneficial effect of both tranexamic acid and aprotinin on blood loss reduction in reoperative valve replacement surgery. *Circulation* 1997;96(9 SUPPL):II96-101.
- Jares M, Vanek T, Straka Z, Brucek P. Tranexamic acid reduces bleeding after off-pump coronary artery bypass grafting. *Journal of Cardiovascular Surgery* 2003;44(2):205-8.
- Kalangos A, Tayyareci G, Pretre R, Di Dio P, Sezerman O. Influence of aprotinin on early graft thrombosis in patients undergoing myocardial revascularization. *European Journal of Cardiothoracic Surgery* 1994;8(12):651-6.
- Karski JM, Teasdale SJ, Norman P, Carroll J, VanKessel K, Wong P, et al. Prevention of bleeding after cardiopulmonary bypass with high-dose tranexamic acid. Double-blind, randomized clinical trial. *Journal of Thoracic & Cardiovascular Surgery* 1995;110(3):835-42.
- Karski J, Djaiani G, Carroll J, Iwanochko M, Seneviratne P, Liu P, et al. Tranexamic acid and early saphenous vein graft patency in conventional coronary artery bypass graft surgery: a prospective randomized controlled clinical trial. *Journal of Thoracic & Cardiovascular Surgery* 2005;130(2):309-14.
- Appendix to: Henry D, Carless P, Fergusson D, et al. The safety of aprotinin and lysine-derived antifibrinolytic drugs in cardiac surgery: a meta-analysis. *CMAJ* 2009;180:183-93. Copyright © 2009, Canadian Medical Association.
- Katoh J, Tsuchiya K, Sato W, Nakajima M, Iida Y. Additional postbypass administration of tranexamic acid reduces blood loss after cardiac operations. *Journal of Thoracic & Cardiovascular Surgery* 1997;113(4):802-4.
- Katsaros D, Petricevic M, Snow NJ, Woodhall DD, Van Bergen R. Tranexamic acid reduces postbypass blood use: a double-blinded, prospective, randomized study of 210 patients. *Annals of Thoracic Surgery* 1996;61(4):1131-5.
- Kipfer B, Englberger L, Gygas E, Nydegger U, Carrel T. Is reduced systemic heparinization justified with heparin-bonded bypass circuits in cardiac surgery? Experience with and without aprotinin. *Transfusion & Apheresis Science* 2003;29(1):17-24.
- Klein M, Keith PR, Dauben HP, Schulte HD, Beckmann H, Mayer G, Elert O, Gams E. Aprotinin counterbalances an increased risk of perioperative hemorrhage in CABG patients pre-treated with Aspirin. *European Journal of Cardio-Thoracic Surgery* 1998;14(4):360-366.
- Kluger R, Olive DJ, Stewart AB, Blyth CM. Epsilon-aminocaproic acid in coronary artery bypass graft surgery: preincision or postheparin?. *Anesthesiology* 2003;99(6):1263-1269.
- Koster A, Huebler S, Merkle F, Hentschel T, Grundel M, Krabatsch T, Tambour L, Praus M, Habazettl H, Kuebler WM, Kuppe H. Heparin-level-based anticoagulation management during cardiopulmonary bypass: a pilot investigation on the effects of a half-dose aprotinin protocol on postoperative blood loss and hemostatic activation and inflammatory response. *Anesthesia & Analgesia* 2004;98(2):285-290.
- Kuepper F, Dangas G, Mueller-Chorus A, Kulka PM, Zenz M, Wiebalck A. Fibrinolytic activity and bleeding after cardiac surgery with cardiopulmonary bypass and low-dose aprotinin therapy. *Blood Coagulation & Fibrinolysis* 2003;14(2):147-153.
- Kuitunen A, Hiippala S, Vahtera E, Rasi V, Salmenpera M. The effects of aprotinin and tranexamic acid on thrombin generation and fibrinolytic response after cardiac surgery. *Acta Anaesthesiologica Scandinavica* 2005;49(9):1272-1279.
- Kuitunen AHS. Tranexamic acid does not correct the haemostatic impairment caused by hydroxyethyl starch (200 kDa/0.5) after cardiac surgery. *Blood Coagul Fibrinolysis* 2006;17:639-45.
- Kunt AS, Darcin OT, Aydin S, Demir D, Selli C, Andac MH. Mini-dose pump-prime aprotinin inhibited enhanced fibrinolytic activity and reduced blood loss and transfusion requirements after coronary artery bypass surgery. *Journal of Thrombosis & Thrombolysis* 2005;19(3):197-200.
- Lab M, Welz A, Kochs M, Mayer G, Schwandt M, Hannekum A. Aprotinin in elective primary bypass surgery. *European Journal of Cardio-thoracic Surgery* 1995;9:206-10.
- Landymore RW, Murphy JT, Lummis H, Carter C. The use of low-dose aprotinin, epsilon-aminocaproic acid or tranexamic acid for prevention of mediastinal bleeding in patients receiving aspirin before coronary artery bypass operations. *European Journal of Cardio-Thoracic Surgery* 1997;11:798-800.
- Lemmer JH, Jr, Stanford W, Bonney SL, Breen JF, Chomka EV, Eldredge WJ, Holt WW, Karp RB, Laub GW, Lipton MJ, et al. Aprotinin for coronary bypass operations: efficacy, safety, and influence on early saphenous vein graft patency. A multicenter, randomized, double-blind, placebo-controlled study. *Journal of Thoracic & Cardiovascular Surgery* 1994;107(2):543-51.
- Lemmer JH, Jr, Dilling EW, Morton JR, Rich JB, Robicsek F, Bricker DL, Hantler CB, Copeland JG, 3rd, Ochsner JL, Daily PO, et al. Aprotinin for primary coronary artery bypass grafting: a multicenter trial of three dose regimens. *Annals of Thoracic Surgery* 1996;62(6):1659-67.
- Levy JH, Pifarre R, Schaff HV, Horrow JC, Albus R, Spiess B, Rosengart TK, Murray J, Clark RE, Smith P. A multicenter, double-blind, placebo-controlled trial of aprotinin for reducing blood loss and the requirement for donor-blood transfusion in patients undergoing repeat coronary artery bypass grafting. *Circulation* 1995;92(8):2236-44.

- Liu B, Belboul A, Radberg G, Tengborn L, Dernevik L, Roberts D, William-Olsson G. Effect of reduced aprotinin dosage on blood loss and use of blood products in patients undergoing cardiopulmonary bypass. *Scandinavian Journal of Thoracic & Cardiovascular Surgery* 1993;27(3-4):149-55.
- Luo J, Huang Y, Lan H. Effect of aprotinin on the red cell immunity in cardiopulmonary bypass. *J Tongji Med Univ* 1998;18:97-100.
- Maccario M, Fumagalli C, Deangelis R, Delfino R, Pergola A, Dottori V, Barberis L. Comparison between low and high doses of aprotinin in heart surgery [Italian]. *Minerva Anestesiologica* 1994;60(6):315-20.
- Mansour EE, Mustafa B. Aprotinin versus tranexamic acid in patients receiving aspirin and undergoing off-pump coronary artery bypass. *Egyptian Journal of Anaesthesia* 2004;20(3):229-236.
- Misfeld M, Dubbert S, Eleftheriadis S, Siemens HJ, Wagner T, Sievers HH. Fibrinolysis-adjusted perioperative low-dose aprotinin reduces blood loss in bypass operations. *Annals of Thoracic Surgery* 1998;66(3):792-799.
- Mohr R, Goor DA, Lusky A, Lavee J. Aprotinin prevents cardiopulmonary bypass-induced platelet dysfunction. A scanning electron microscope study. *Circulation* 1992;86(5:Suppl):II405-9.
- Mongan PD, Brown RS, Thwaites BK. Tranexamic acid and aprotinin reduce postoperative bleeding and transfusions during primary coronary revascularization. *Anesthesia & Analgesia* 1998;87(2):258-265.
- Moran SV, Lema G, Medel J, Irrazaval MJ, Zalaquett R, Garayar B, Flaskamp R. Comparison of two doses of aprotinin in patients receiving aspirin before coronary bypass surgery. *Perfusion* 2000;15(2):105-110.
- Murkin JM, Lux J, Shannon NA, Guiraudon GM, Menkis AH, McKenzie FN, Novick RJ. Aprotinin significantly decreases bleeding and transfusion requirements in patients receiving aspirin and undergoing cardiac operations. *Journal of Thoracic & Cardiovascular Surgery* 1994;107(2):554-61.
- Murphy GJ, Mango E, Lucchetti V, et al. A randomized trial of tranexamic acid in combination with cell salvage plus a meta-analysis of randomized trials evaluating tranexamic acid in off-pump coronary artery bypass grafting. *J Thorac Cardiovasc Surg* 2006;132:475-80.
- Nuttall GA, Oliver WC, Ereth MH, Santrach PJ, Bryant SC, Orszulak TA, Schaff HV. Comparison of blood-conservation strategies in cardiac surgery patients at high risk for bleeding. *Anesthesiology* 2000;92(3):674-682.
- Parvizi R, Azarfarin R, Hassanzadeh S. Ultra-low dose aprotinin effects on reducing the need for blood transfusion in cardiac surgery. *Saudi Med J* 2007;28:49-53.
- Poston RS, White C, Gu J, Brown J, Gammie J, Pierson RN, et al. Aprotinin shows both hemostatic and antithrombotic effects during off-pump coronary artery bypass grafting. *Annals of Thoracic Surgery* 2006;81(1):104-11.
- Rao BH, Saxena N, Chauhan S, Sashikanth M. Use of E-Aminocaproic acid in the management of aspirin related postoperative bleeding in patients undergoing coronary revascularization. *Journal of Anaesthesiology Clinical Pharmacology* 1999;15(3):261-264.
- Rhyderch RD, Khan B, Saleh A, et al. Single dose aprotinin in routine cardiac surgery. *Middle East J Anesthesiol* 1993;12:287-97.
- Rocha E, Hidalgo F, Llorens R, Melero JM, Arroyo JL, Paramo JA. Randomized study of aprotinin and DDAVP to reduce postoperative bleeding after cardiopulmonary bypass surgery. *Circulation* 1994;90(2):921-7.
- Rodríguez IE, Vermeyen KM, De Hert SG, Amsel BJ, Walter PJ. Efficacy and safety of aprotinin in aortocoronary bypass and valve replacement operations: a placebo-controlled randomized double-blind study. *Perfusion* 1996;11(4):313-8.
- Royston D, Bidstrup BP, Taylor KM, Sapsford RN. Effect of aprotinin on need for blood transfusion after repeat open-heart surgery. *Lancet* 1987;2(8571):1289-91.
- Santamaria A, Mateo J, Oliver A, Litvan H, Murillo J, Souto JC, Fontcuberta J. The effect of two different doses of aprotinin on hemostasis in cardiopulmonary bypass surgery: similar transfusion requirements and blood loss. *Haematologica* 2000;85(12):1277-1284.
- Santos ATL, Kalil RAK, Bauemann C, Pereira JB, Nesralla IA. A randomized, double-blind, and placebo-controlled study with tranexamic acid of bleeding and fibrinolytic activity after primary coronary artery bypass grafting. *Brazilian Journal of Medical & Biological Research* 2006;39(1):63-9.
- Schweizer A, Hohn L, Morel DR, Kalangos A, Licker M. Aprotinin does not impair renal haemodynamics and function after cardiac surgery. *British Journal of Anaesthesia* 2000;84(1):16-22.
- Shore-Lesserson L, Reich DL, Vela-Cantos F, Ammar T, Ergin MA. Tranexamic acid reduces transfusions and mediastinal drainage in repeat cardiac surgery. *Anesthesia & Analgesia* 1996;83(1):18-26.
- Speekenbrink RG, Vonk AB, Wildevuur CR, Eijssman L. Hemostatic efficacy of dipyridamole, tranexamic acid, and aprotinin in coronary bypass grafting. *Annals of Thoracic Surgery* 1995;59(2):438-42.
- Stammers AH, Huffman S, Alonso A, Fristoe LW, Hill G, Casebeer D, Diego RP, Song Z. The antiinflammatory effects of aprotinin in patients undergoing cardiac surgery with cardiopulmonary bypass. *Journal of Extra-Corporeal Technology* 1997;29(3):114-122.
- Swart MJ, Gordon PC, Hayse-Gregson PB, Dyer RA, Swanepoel AL, Buckels NJ, Schall R, Odell JA. High-dose aprotinin in cardiac surgery--a prospective, randomized study. *Anaesthesia & Intensive Care* 1994;22(5):529-33.
- Taggart DP, Djapardy V, Naik M, Davies A. A randomized trial of aprotinin (Trasylo) on blood loss, blood product requirement, and myocardial injury in total arterial grafting. *Journal of Thoracic & Cardiovascular Surgery* 2003;126(4):1087-1094.
- Trinh-Duc P, Wintrebert P, Bouffroy D, Albat B, Thevenet A, Roquefeuil B. Comparison of the effects of epsilon-aminocaproic acid and aprotinin on intra- and postoperative bleeding in heart surgery. [French]. *Annales de Chirurgie* 1992;46(8):677-683.
- Van der Linden J, Lindvall G, Sartipy U. Aprotinin decreases postoperative bleeding and number of transfusions in patients on clopidogrel undergoing coronary artery bypass graft surgery: A double-blind, placebo-controlled, randomized clinical trial. *Circulation* 2005;112(Suppl 1):I-276-I-280.
- Vander Salm TJ, Kaur S, Lancey RA, Okike ON, Pezzella AT, Stahl RF, Leone L, Li J-M, Valeri CR, Michelson AD. Reduction of bleeding after heart operations through the prophylactic use of epsilon-aminocaproic acid. *Journal of Thoracic & Cardiovascular Surgery* 1996;112(4):1098-1107.
- Wei M, Jian K, Guo Z, et al. Effects of half-dose aprotinin in off-pump coronary artery bypass grafting. *World J Surg* 2006;30:1108-14.
- Wei M, Jian K, Guo Z, Wang L, Jiang D, Zhang L, Tarkka M. Tranexamic acid reduces postoperative bleeding in off-pump coronary artery bypass grafting. *Scandinavian Cardiovascular Journal* 2006;40(2):105-109.
- Wendel HP, Heller W, Michel J, Mayer G, Ochsenfahrt C, Graeter U, Schulze J, Hoffmeister HM, Hoffmeister HE. Lower cardiac troponin T levels in patients undergoing cardiopulmonary bypass and receiving high-dose aprotinin therapy indicate reduction of perioperative myocardial damage. *Journal of Thoracic & Cardiovascular Surgery* 1995;109(6):1164-72.
- Wong BI, McLean RF, Fremes SE, Deemar KA, Harrington EM, Christakis GT, Goldman BS. Aprotinin and tranexamic acid for high transfusion risk cardiac surgery. *Annals of Thoracic Surgery* 2000;69(3):808-816.
- Zabeeda D, Medalion B, Sverdlöv M, Ezra S, Schachner A, Ezri T, Cohen AJ. Tranexamic acid reduces bleeding and the need for blood transfusion in primary myocardial revascularization. *Annals of Thoracic Surgery* 2002;74(3):733-738.
